# Supplementary material for: Impact of topography on black carbon transport to the southern Tibetan Plateau during pre-monsoon season and its climatic implication
Source: Copernicus journal article supplement (doi:10.5194/acp-2019-905), 2019-10-14
Supplement: Supplementary file 1 [file acp-2019-905-supplement.pdf]

# Supporting materials for “Impact of topography on black carbon transport to the southern Tibetan Plateau during pre-monsoon season and its climatic implication”

Meixin Zhang, Chun Zhao\*, Zhiyuan Cong, Qiuyan Du, Mingyue Xu, Yu Chen, Ming Chen, Rui Li, Yunfei Fu, Lei Zhong, Shichang Kang, Delong Zhao, Yan Yang

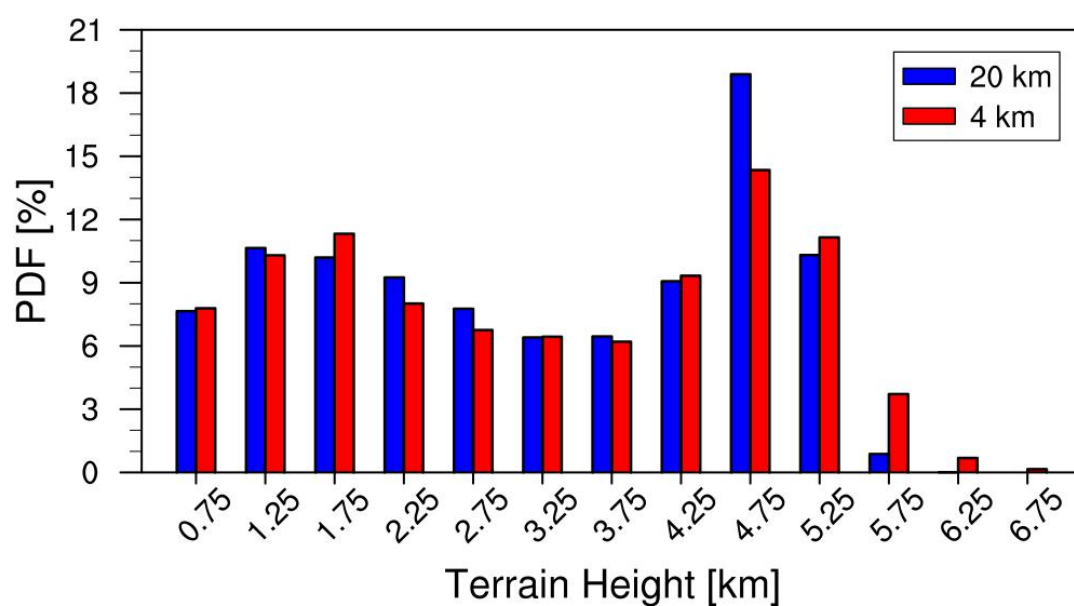

**Figure S1.** Probability distribution of terrain height between the topography representations at 20 km and 4 km resolutions as shown in Fig. 3.

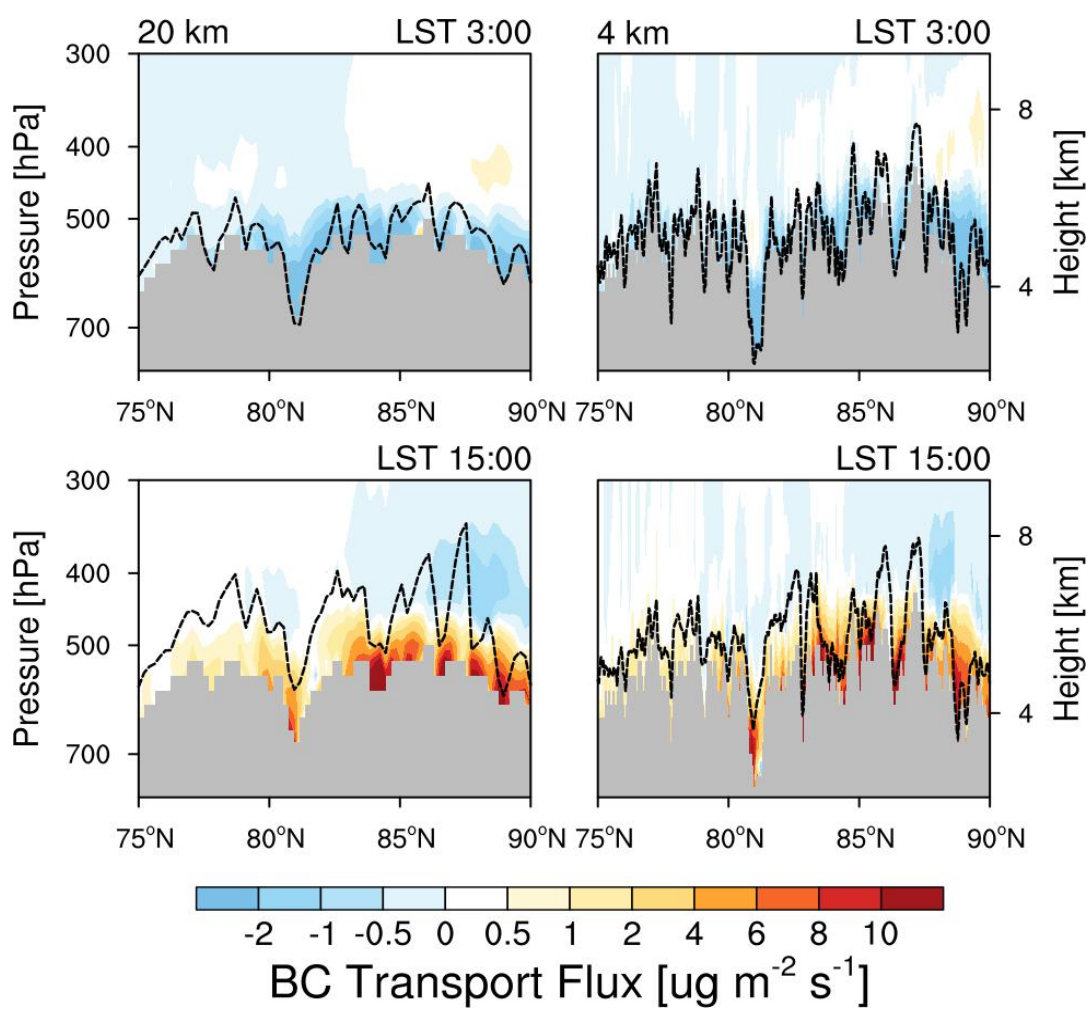

**Figure S2.** Cross section of BC flux anomalies along the black dash cross line shown in Fig. 3 (remove daily mean).

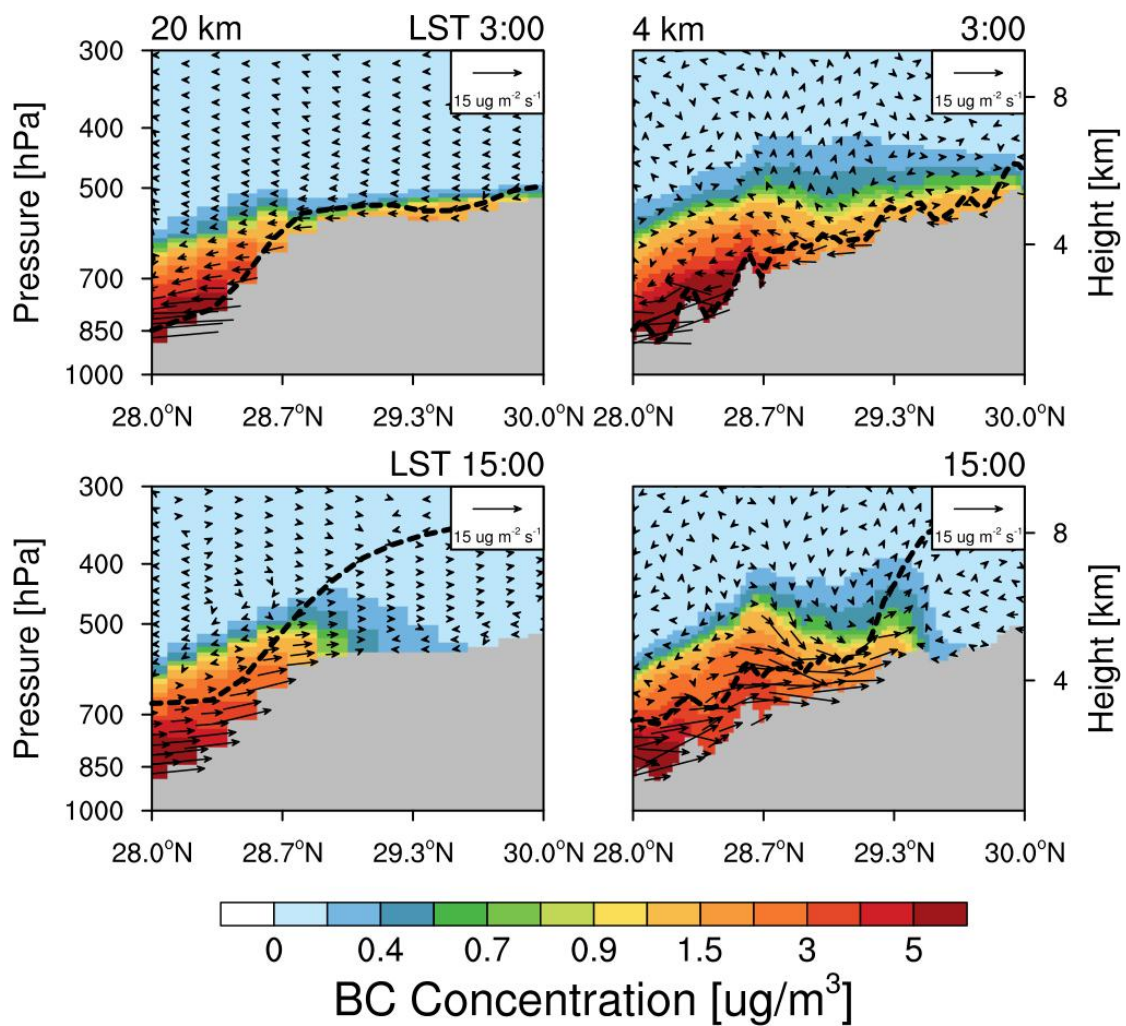

**Figure S3.** Cross section of BC flux anomalies along the valley (remove daily mean).

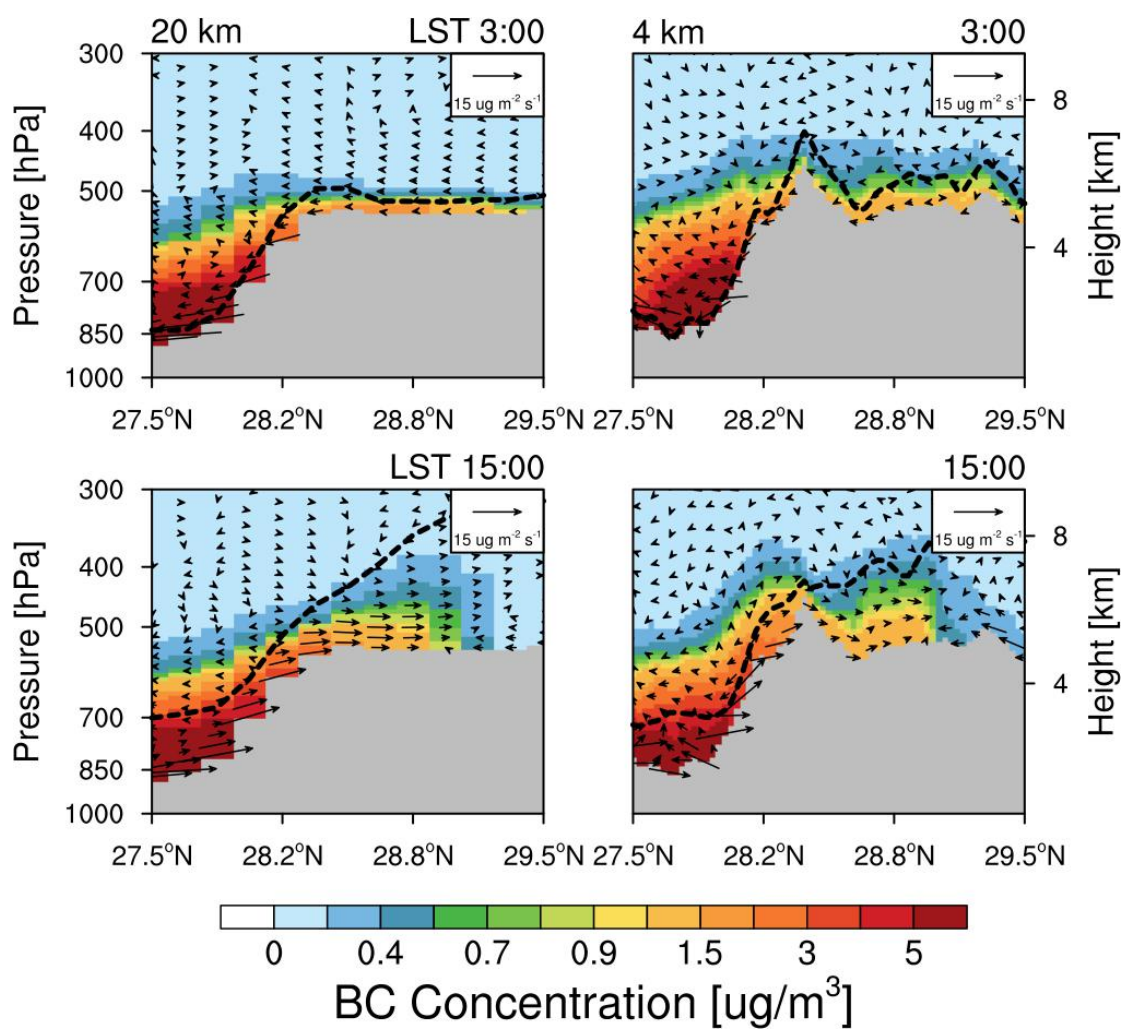

**Figure S4.** Cross section of BC flux anomalies cross the mountain (remove daily mean).

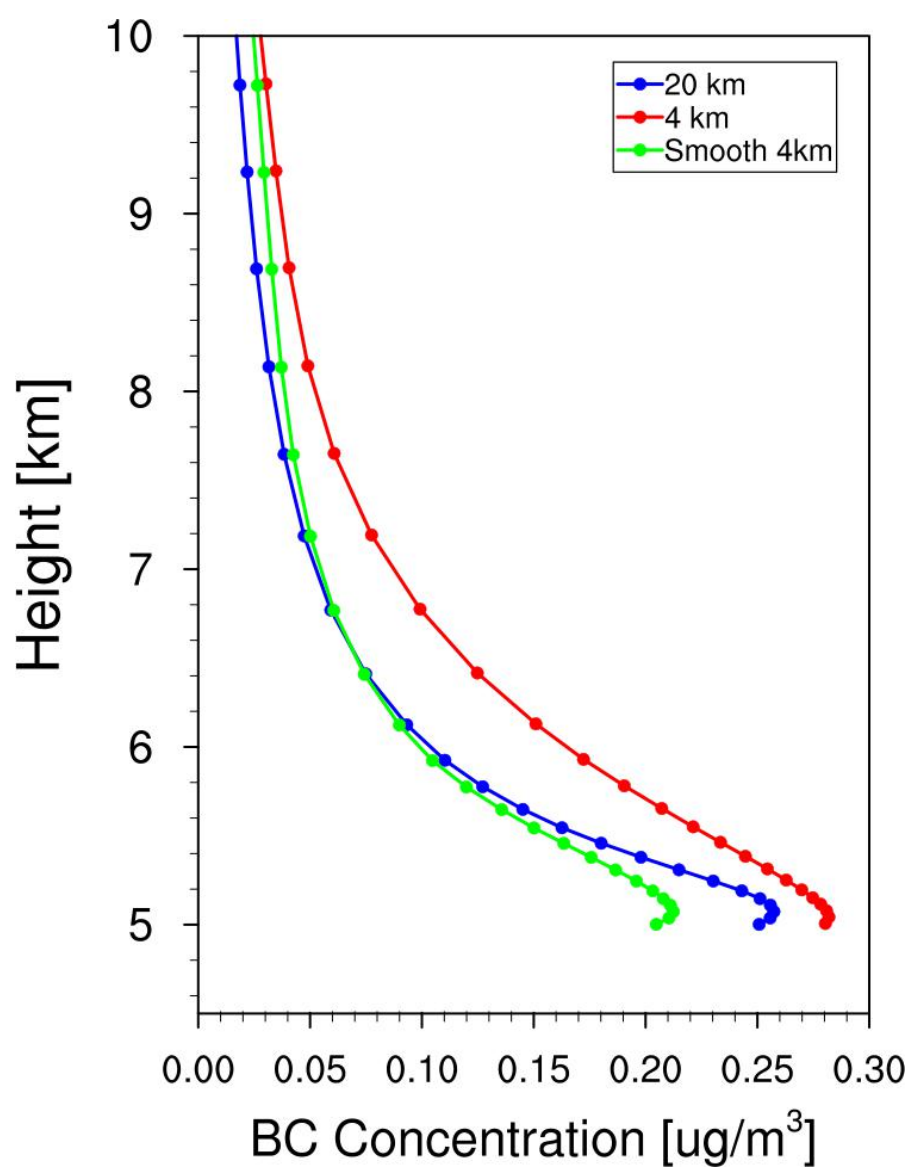

**Figure S5.** Vertical profile of BC concentration averaged over the TP (with elevation > 4 km) within the domain shown in Fig. 1 of April 1-20, 2016 from the simulations at 20 km and 4 km resolutions. The result from the sensitivity experiment at 4 km resolution but with the smoothing 20 km topography is also shown.

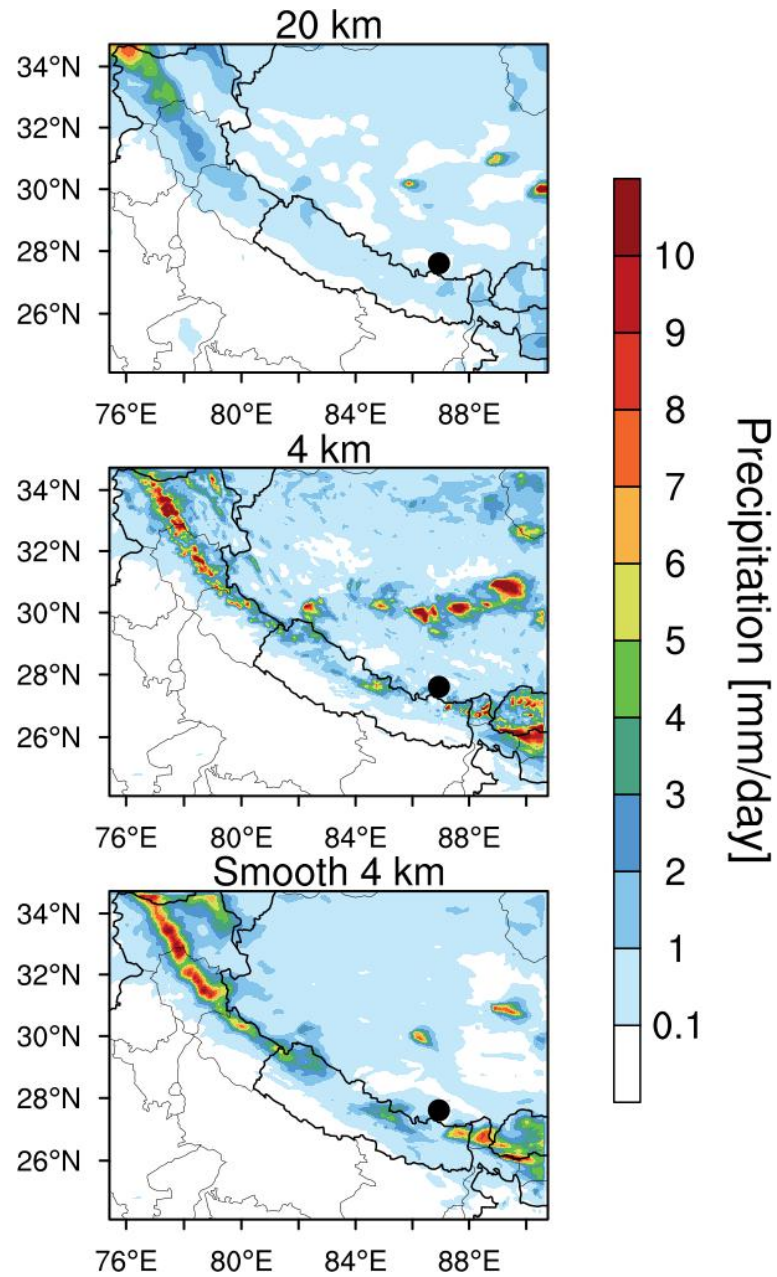

**Figure S6.** Spatial distributions of precipitation averaged for April 1-20, 2016 from the simulations at 20 km and 4 km resolutions. The sensitivity simulation at 4 km resolution but with the smoothing 20km-topography is also shown.
